1  
2  
3  
4  
5  
6  
7  
8  
9  
10  
11  
12  
13  
14  
15  
16  
17  
18

# Missing pieces in the full annual cycle of fish ecology: a systematic review of the phenology of freshwater fish research

Megan E. Brady<sup>1\*</sup>, Andrew M. Chione<sup>1</sup>, and Jonathan B. Armstrong<sup>1</sup>

<sup>1</sup> Department of Fisheries and Wildlife, Oregon State University, Corvallis, Oregon, United States of America

\* Corresponding author

Email: [megan.brady@oregonstate.edu](mailto:megan.brady@oregonstate.edu) (MEB)

## 19 **Abstract**

20 In recent decades, fish ecologists have become increasingly aware of the need for spatially  
21 comprehensive sampling. However, a corresponding reflection on the temporal aspects of  
22 research has been lacking. We quantified the seasonal timing and extent of freshwater fish  
23 research. Since reviewing all prior work was not feasible, we considered two different subsets.  
24 First, we compiled the last 30 years of ecological research on juvenile Pacific salmon and trout  
25 (*Oncorhynchus* spp.) (n = 371 studies). In addition to the aggregate, we compared groups  
26 classified by subject matter. Next, to evaluate whether riverscape ecology has embraced space at  
27 the expense of time, we compiled research across taxa in which fish were enumerated in a  
28 spatially continuous fashion (n = 46). We found that ecological *Oncorhynchus* spp. research was  
29 biased towards summer (40% occurred during June-August) and the month of June in particular,  
30 at the expense of winter work (only 13% occurred during December-February). Riverscape  
31 studies were also biased toward summer (47% of studies) and against winter (11%). It was less  
32 common for studies to encompass multiple seasons (43% of ecological *Oncorhynchus* spp.  
33 studies and 54% of riverscape studies) and most were shorter than 4 months (73% of ecological  
34 *Oncorhynchus* spp. studies and 81% of riverscape studies). These temporal biases may cause  
35 researchers to overemphasize ecological phenomena observed during summer and limit our  
36 ability to recognize seasonal interactions such as carry-over effects or compensatory responses.  
37 Full year and winter studies likely hold valuable insights for conservation and management.

38

## 39 **Introduction**

40 A key challenge in conservation is to understand how abiotic and biotic heterogeneity mediate  
41 the function of ecosystems and the survival of biota that inhabit these environments. This  
42 heterogeneity exists in both space and time, creating a shifting mosaic of physical and biological  
43 conditions that has significant ramifications for biota [1]. Phenomena ranging from ontogenetic  
44 niche shifts [2] to the stability of fisheries [3] can only be understood by jointly considering  
45 interactions between space and time. However, because resources are limited and characterizing  
46 stream heterogeneity is a non-trivial task, it is often not feasible to study multiple dimensions of  
47 variation simultaneously. Indeed, many fundamental concepts in stream ecology are either  
48 spatially or temporally focused.

49 For example, spatial patterns of biota are often described with minimal reference to time.  
50 This applies to early work, such as the longitudinal zonation of fishes [4], but also the River  
51 Continuum Concept [5] and the contemporary emphasis on high spatial resolution sampling  
52 found in “riverscape” ecology [6]. Although time is recognized as the “fourth dimension” of the  
53 riverscape [7] and the intersections of various temporal and spatial scales has been noted as  
54 important [6], in practice, the suffix “scape” is typically used when working at large spatial  
55 extents of data, which often compounds the challenges of incorporating time.

56 Similarly, time is often considered independently in studies of both habitat and fish.  
57 Stream ecologists increasingly embrace a regime approach to characterizing temporal variation  
58 in habitat conditions, originating with the Natural Flow Regime [8], which considered the  
59 statistical distribution of conditions and metrics such as event magnitude, frequency, seasonal  
60 timing, predictability, duration, and rates of change. The regime concept is now applied beyond  
61 water quantity to include aspects of water quality [9,10], as well as physical attributes such as  
62 sediment, large wood, and abundance of pools [11]. In fisheries ecology, temporal variation is

63 probably most commonly studied in the form of population dynamics, i.e., fluctuations in  
64 abundance typically described at an annual resolution. However, many important processes that  
65 may scale up to affect population dynamics (e.g. growth) play out at intra-annual timescales and  
66 relate to seasonality.

67         It is often recognized that short-term datasets can be inadequate because they fail to  
68 capture historical levels of productivity (i.e. the shifting baseline) or reveal coarser scale  
69 temporal patterning such as regime shifts [12]. Likewise, for cyclically patterned temporal  
70 variation, interpretations may be misleading if they are based on a limited portion of a cycle. For  
71 example, many fish switch between habitat types throughout the diel cycle [13] so only studying  
72 animals during daytime may fail to capture important habitats. Similarly, refuge habitat  
73 identified in summer may not represent refuge habitat for other seasons and stressors [14].  
74 Riverine systems may exhibit extreme seasonal variation, with water temperatures ranging 20°C  
75 or more and flows varying 100-fold. This strongly affects not only fish and other aquatic  
76 organisms, but also the feasibility of field sampling. While a temperature logger can effectively  
77 collect data every day of the year, the cost and logistical challenges of sampling fish vary  
78 tremendously and can strongly govern when biological data are collected. Extrapolating from  
79 data that pertain to specific points in time can lead to misleading interpretations regarding how  
80 fish behave, the production capacity for ecosystems, and what locations or habitat types are  
81 important [15,16]. This is particularly problematic in the study of mobile organisms that undergo  
82 substantial physiological and ecological changes throughout their lifetimes, such as Pacific  
83 salmonids. The objective of this paper is to characterize the temporal attributes of fish ecology  
84 research to elucidate potential data gaps and guide future research.

85           Recent work on birds, amphibians, reptiles, and mammals found strong seasonal biases in  
86 field research [17], but analogous work on fish has been lacking. The assertion that winter fish  
87 ecology is an important, yet understudied portion of the research portfolio is not new [18];  
88 however, this hypothesis remains unquantified. It was not feasible to screen the research for all  
89 fish species during all life phases, so we limited our systematic review to a single taxon of fish:  
90 *Oncorhynchus* spp. We focused on juvenile Pacific salmon and trout in freshwater because they  
91 are well-studied (providing us the power to detect trends in sampling), they live in highly  
92 seasonal environments (which means an incomplete understanding of the annual cycle would be  
93 a problem and is thus important to test for), and they are distributed across multiple continents  
94 (thus representing a wide-spread species of interest). Here, we characterize the temporal aspects  
95 of freshwater fish ecological research within the taxon of Pacific salmon and trout  
96 (*Oncorhynchus* spp.) during the last 30 years. We characterized patterns in the seasonal timing  
97 and duration of ecological field studies and considered how these patterns varied across three  
98 focal topics: fish-habitat interactions, trophic ecology, and spatial distribution. This analysis of a  
99 specific taxon was then complemented with a cross-taxa analysis. We assessed whether spatially  
100 extensive sampling has come at the expense of time by reviewing the timing of “riverscape”  
101 studies across all fish taxa.

102

## 103 **Materials and methods**

### 104 **Data screening**

105 To determine whether and to what extent temporal biases are present in fish field research, we  
106 conducted a review of two case studies: 1) research within the *Oncorhynchus* species and 2)  
107 research across fish species within “riverscape” studies. We defined “riverscape” studies as those

108 studies that employed the use of spatially continuous data (or nearly so) that covered a high  
109 spatial extent so that multi-scale patterns could be revealed [6] as opposed to the more typical  
110 method of using of a handful of points that are extrapolated to represent large extents. We  
111 focused on three temporal aspects of research: 1) what months and seasons juvenile salmonid  
112 ecology research occurs, 2) the duration of studies, and 3) whether seasons were studied  
113 individually or if seasonal interactions were examined.

114 To examine our first case study of *Oncorhynchus* research, we reviewed 13 journals that  
115 commonly publish fisheries ecology research as opposed to human consumption of fish research.  
116 Using the Web of Science database (last searched 21 August 2020), we performed the following  
117 search: TS=(salmon OR salmonids OR *Oncorhynchus*) AND SO=(CANADIAN JOURNAL OF  
118 FISHERIES "AND" AQUATIC SCIENCES OR Ecology OR Ecology of Freshwater Fish OR  
119 Ecosphere OR Ecosystems OR Environmental Biology of Fishes OR Freshwater Biology OR  
120 Hydrobiologia OR North American Journal of Fisheries Management OR Oecologia OR PLoS  
121 ONE OR Science OR Transactions of the American Fisheries Society) Indexes=SCI-  
122 EXPANDED, SSCI, A&HCI, ESCI Timespan=1988-2017. The past 30 years was chosen to  
123 characterize the current patterns of research. We screened the articles and selected those that  
124 dealt with the ecology of juvenile *Oncorhynchus* species during freshwater residence. The  
125 juvenile life stages of fry, parr, and smolt were all included. Only papers that presented original,  
126 ecologically focused data were included, whether they were observational studies or  
127 experimental studies conducted in a natural environment. Many studies were excluded because  
128 they were not ecological field studies. We did not include studies on fish species other than  
129 *Oncorhynchus*, laboratory studies, physiological response or manipulation research, smolt-to-  
130 adult survival studies, research dealing with the adult life stage of *Oncorhynchus* spp., studies

131 occurring in estuarine or marine environments, studies that collected physical or biological  
132 habitat data but did not actually sample fish, reviews, or models not validated with field data.  
133 This resulted in 371 articles examined in this study (S1 Fig).

134 To identify temporal patterns across fish species, we identified “riverscape” studies that  
135 utilized spatially continuous sampling [6]. The term “riverscape” has been applied inconsistently  
136 but is often used to refer to sampling employing large spatial extent. We use the term to include  
137 large spatial extent sampling as well as sampling in line with the argument by Fausch et al. [6]  
138 for sampling across multiple spatial scales to observe patterns and processes playing out  
139 throughout entire river systems in order to sample rivers at the same scale that we manage them  
140 at. Using the Web of Science database (last searched 23 October 2020), we performed the  
141 following search: TS=(riverscape OR spatially continuous OR longitudinal distribution OR  
142 Fausch et al. 2002) AND TS=(fish OR fishes OR salmon) AND TS=(stream OR river OR  
143 freshwater OR lake) Indexes=SCI-EXPANDED, SSCI, A&HCI, ESCI Timespan=1988-2017.  
144 We then examined every article and selected those that dealt with spatially continuous, high  
145 spatial extent, or “riverscape”-scale sampling that included fish data collection. This resulted in  
146 46 articles examined in this study (S2 Fig).

147

## 148 **Data analysis**

149 We classified each publication for both the ecological dataset and the riverscape dataset by the  
150 temporal aspects of data collection. First, we read the Methods section of each article screened  
151 and recorded the presence/absence of data collection in each month and season. We defined  
152 seasons meteorologically as aligned with the calendar months of June 1-August 31 for summer,  
153 September 1-November 30 for autumn, December 1-February 28 for winter, and March 1-May

154 30 for spring. Seasons were not defined by solstice or equinox to stay consistent with  
155 presence/absence within a single month. Studies may encompass more than one month, therefore  
156 the number of data points for these analyses are greater than the number of studies included in  
157 the review. Second, we quantified the frequency of the number of meteorological seasons (1-4)  
158 that were included in these studies to analyze temporal extent and consideration of inter-seasonal  
159 interactions (i.e., carry-over effects).

160 To explore whether temporal aspects of sampling differed among research areas, we  
161 classified each study into three focal areas: 1) fish-habitat interactions and the impact of habitat  
162 units and types on juvenile salmonid biology or behavior, 2) trophic ecology including fish diet,  
163 foraging, and food web structure, and 3) spatial distribution including movement and landscape-  
164 scale distribution. Studies examining fish growth and survival were often presented by  
165 researchers as a function of some aspect of one of the three focal areas identified and were  
166 classified accordingly. The temporal distribution and extent of sampling effort was then  
167 quantified both collectively and by research category. Each study was only classified into one of  
168 the three focal areas based on the main objective of the study. Studies that did not fall into one of  
169 these four main categories were classified as “Other” and included in overall analysis but not the  
170 subset analyses.

171

## 172 **Statistical methods**

173 We tested for temporal biases in temporal distribution and extent using Pearson  $\chi^2$ -tests in R  
174 4.0.2. Equal values would indicate that no bias exists, supporting the null hypothesis. While the  
175 test is objective, we acknowledge that the interpretation is subjective due to the assumptions that



176 all months and seasons are equally important and present equal stresses, limitations, or  
177 opportunities for growth, fitness, and survival for juvenile salmonids.

178 We also acknowledge that seasonality varies with latitude, elevation, and position in  
179 watershed, so the ecological conditions associated with a particular month or season may vary  
180 among locations (and thus among the studies in our paper). Thus, the implications of the  
181 temporal biases we observed may be somewhat context dependent.

182

## 183 **Results**

### 184 **Monthly temporal distribution of studies**

185 At a monthly resolution across all ecological topics within juvenile *Oncorhynchus* spp. studies,  
186 we found that the most frequently represented month was 3-6 times more common than the least  
187 frequently represented month (Fig 1). December was the least represented month across all  
188 topics, while the summer months of June, July, and August were most common among topics.  
189 The month of June had a significantly higher proportion of studies than the month of December  
190 at 14% and 3%, respectively.

191

192 **Fig 1. Temporal distribution of juvenile salmon ecology studies.** Left column: monthly  
193 distribution (left to right: January to December) of sampling effort for juvenile Pacific salmon  
194 and trout studies from 1988-2017 for (A) all studies ( $X^2=289.58$ ,  $p < 0.0001$ ,  $n=1476$ ,  
195 median=119.5), (B) habitat studies ( $X^2=97.421$ ,  $p < 0.0001$ ,  $n=413$ , median=28), (C) trophic  
196 ecology studies ( $X^2=78.131$ ,  $p < 0.0001$ ,  $n=244$ , median=18), (D) spatial distribution studies  
197 ( $X^2=53.67$ ,  $p < 0.0001$ ,  $n=439$ , median=27). Right column: seasonal distribution of sampling  
198 effort for juvenile Pacific salmon and trout studies from 1988-2017 for (E) all studies

199 (X<sup>2</sup>=243.39, p < 0.0001, n=1476, median=345.5), (F) habitat studies (X<sup>2</sup>=84.482, p < 0.0001,  
200 n=413, median=83), (G) trophic ecology studies (X<sup>2</sup>=56.295, p < 0.0001, n=244, median=57.5),  
201 (D) spatial distribution studies (X<sup>2</sup>=45.258, p < 0.0001, n=349, median=81). The number of  
202 studies for each month or season was calculated using presence or absence of research during  
203 that time frame. Dashed horizontal lines are data median. Studies may occupy more than one  
204 month or season. Seasons were defined meteorologically, but as whole months. Summer is  
205 defined as the months June, July, and August; Autumn is defined as the months September,  
206 October, and November; Winter is defined as the months December, January, and February;  
207 Spring is defined as the months March, April, and May.

208

## 209 **Seasonal temporal distribution of studies**

210 Across all ecological topics within juvenile *Oncorhynchus* spp. studies, we found that 39-44% of  
211 studies occurred during summer while only 10-15% of studies occurred during winter (Fig 1).  
212 There has been little change in the temporal distribution of research efforts with the proportion of  
213 winter studies remaining significantly lower than summer studies (Fig 2).

214

215 **Fig 2. Seasonal study distribution over time.** Change in the proportional temporal distribution  
216 (seasonal timing) of all studies published from 1988-2017 in 5-year increments.

217

## 218 **Monthly temporal extent of studies**

219 At a monthly resolution across all ecological topics within juvenile *Oncorhynchus* spp. studies,  
220 we found that most studies had limited temporal extent across the annual cycle, with 71-75% of

221 studies containing data from 4 months or less (Fig 3). Less than 2-8% of studies across all topics  
222 encompassed data from all 12 months of the year.

223

224 **Fig 3. Temporal extent of juvenile salmon ecology studies.** Left column: frequency of the  
225 number of months per calendar year (1-12) found in juvenile Pacific salmon and trout studies  
226 from 1988-2017 for (A) all studies ( $X^2=670.07$ ,  $p < 0.0001$ ,  $n=371$ , median=5.1), (B) habitat  
227 studies ( $X^2=173.55$ ,  $p < 0.0001$ ,  $n=108$ , median=4.6), (C) trophic ecology studies ( $X^2=120.92$ ,  $p$   
228  $< 0.0001$ ,  $n=60$ , median=8.3), (D) spatial distribution studies ( $X^2=173.01$ ,  $p < 0.0001$ ,  $n=89$ ,  
229 median=5.1). Right column: frequency of the number of seasons per calendar year (1-4) found in  
230 juvenile Pacific salmon and trout studies from 1988-2017 for (E) all studies ( $X^2=230.95$ ,  $p <$   
231  $0.0001$ ,  $n=371$ , median=17.8), (F) habitat studies ( $X^2=80.296$ ,  $p < 0.0001$ ,  $n=108$ , median=16.7),  
232 (G) trophic ecology studies ( $X^2=19.6$ ,  $p < 0.001$ ,  $n=60$ , median=20.8), (H) spatial distribution  
233 studies ( $X^2=72.573$ ,  $p < 0.0001$ ,  $n=89$ , median=14.6). The extent or duration was calculated by  
234 counting the total number of unique months (in a calendar year) that were included in each study  
235 and categorizing them by season as defined above. Data median is marked with a dashed  
236 horizontal line. Studies were only represented once at their greatest monthly extent and greatest  
237 seasonal extent.

238

### 239 **Seasonal temporal extent of studies**

240 Across all ecological topics within juvenile *Oncorhynchus* spp. studies, we found that 48-63% of  
241 studies occurred during a single season while only 6-10% of studies encompassed field sampling  
242 from all four seasons (Fig 3). Only 43% of all studies collected data from multiple seasons and  
243 73% of studies were shorter than 4 months. Again, there has been little change in the temporal

244 extent of research efforts with the proportion of single-season studies remaining significantly  
245 higher than multi-season or year-round studies (Fig 4).

246

247 **Fig 4. Seasonal study extent over time.** Change in the proportional temporal extent (number of  
248 seasons included) of all studies published from 1988-2017 in 5-year increments.

249

## 250 **Riverscape studies**

251 Analysis of riverscape studies across fish species revealed wider biases in temporal distribution  
252 at monthly and seasonal scales. The most frequently represented month was 8x more common  
253 than the least frequently represented month (Fig 5). January and February were the least  
254 represented months, while June, July, August, and September were most common. Summer  
255 encompassed 47% of all riverscape studies while only 11% of studies occurred during winter  
256 (Fig 5).

257

258 **Fig 5. Distribution and extent of riverscape studies.** (A) Monthly distribution (left to right:  
259 January to December) of sampling effort for spatially continuous “riverscape” studies involving  
260 all fish species from 1988-2017 ( $X^2=69.089$ ,  $p < 0.0001$ ,  $n=158$ , median=8); (B) seasonal  
261 distribution of sampling effort for riverscape studies ( $X^2=54.152$ ,  $p < 0.0001$ ,  $n=158$ ,  
262 median=33); (C) frequency of the number of months per calendar year (1-12) found in riverscape  
263 studies ( $X^2=97.038$ ,  $p < 0.0001$ ,  $n=46$ , median=3.3); (D) frequency of the number of seasons per  
264 calendar year (1-4) found in riverscape studies ( $X^2=18.174$ ,  $p < 0.001$ ,  $n=46$ , median=22.83).  
265 The number of studies for each month or season was calculated using presence or absence of  
266 research during that time frame. Dashed horizontal lines are data median. Studies may occupy

267 more than one month or season. Seasons were defined meteorologically, but as whole months.  
268 Summer is defined as the months June, July, and August; Autumn is defined as the months  
269 September, October, and November; Winter is defined as the months December, January, and  
270 February; Spring is defined as the months March, April, and May.

271  
272 Monthly temporal extent was limited within riverscape studies as well. Spatially  
273 continuous studies were almost entirely conducted during a limited amount of time: 81%  
274 contained data from 4 months or less and only 4% of studies encompassed data from a full 12  
275 months out of the year (Fig 5). Seasonal extent for riverscape studies was the one metric that was  
276 more representative than the ecological studies we examined: 46% of riverscape studies occurred  
277 during a single season, 35% occurred over two seasons, 9% occurred over three seasons, and  
278 11% occurred during all four seasons (Fig 5).

279

## 280 **Discussion**

281 In our review of 371 ecological juvenile *Oncorhynchus* spp. studies and 46 riverscape studies  
282 from the last 30 years, we observed strong biases in seasonal timing (distribution) and temporal  
283 extent. Within research topics where seasonality is particularly relevant, we observed the same  
284 general pattern of temporal bias; the period of summer was overrepresented in the study of fish-  
285 habitat interactions, trophic ecology, and spatial distribution. Below we discuss these temporal  
286 patterns of data collection and consider their potential causes and consequences.

287

### 288 **Bias in temporal distribution of studies**

289 The most conspicuous pattern in the data was the lack of research during winter. For example,  
290 the month of December had less than one-quarter as many studies as that of June. Winter studies  
291 represented only 10-15% of total ecological research and 11% of riverscape studies. Winter may  
292 be tempting to overlook because it is generally a period of low biological activity in freshwater  
293 ecosystems. Winter is typically the coldest time of year, limiting the scope for growth and  
294 activity in aquatic poikilotherms. Further, winter is the darkest time of year, limiting primary  
295 productivity [19] and the foraging opportunity for visual predators [15]. Indeed, many stream-  
296 dwelling fishes tend to allocate energy to fat stores in anticipation of winter [20], suggesting it is  
297 generally a period of negative energy balance. However, this does not mean that understanding  
298 winter ecology is not critical. If fish rely on summer and fall fat stores to survive winter, then any  
299 food intake during winter helps to minimize the need to deplete those stores. Identifying winter  
300 foraging opportunities, trophic pathways, and habitat use could provide insights into how fish  
301 survive during this time of year [21]. For example, recent research exploring how environmental  
302 conditions influence fish interactions and movement has identified habitat not utilized outside of  
303 the winter months [22]. In many systems, winter survival is hypothesized to be a limiting factor  
304 to freshwater population productivity [23] and reducing winter mortality is often an objective of  
305 largescale restoration efforts [24]. Though juvenile salmonids may be less active in winter and  
306 not achieve substantial growth in many cases, there is evidence that winter fish growth may  
307 exceed growth observed during other seasons for some fish [25]. Understanding winter habitat  
308 use and foraging ecology could help improve our ability to increase overwinter survival.

309 The lack of winter research contrasted with the overabundance of summer studies. While  
310 emphasis on summer has benefits, such as an improved understanding of salmonid ecology  
311 during periods of climate stress, relying on summer-biased data could pose problems for

312 conservation and management by violating assumptions of models. For example, species  
313 distribution models (SDM) are increasingly used in climate change adaptation and rely on the  
314 assumptions that a species occurs in all suitable habitats and that a species only occupies a  
315 portion of that suitable habitat due to constraining factors such as competition or predation [26].  
316 Developing such models from temporally biased data would be valid only if the focal species  
317 were sedentary and their habitat use did not vary over time. However, it's rarely possible to  
318 confirm that a species meets these criteria without having temporally representative data (i.e.,  
319 you can't dismiss the possibility of winter habitat shifts without data on winter habitat use).  
320 Using data from a limited period of time can cause SDMs to erroneously dismiss critically  
321 important habitat. For example, one study demonstrated that SDMs based on seasonally biased  
322 data failed to identify the habitats needed to support both hibernation and reproduction in bats  
323 [27]. Defining climate refugia for fish based on summer-biased data [28] could similarly leave  
324 out critical overwinter habitats if fish exhibit seasonal movements and require multiple habitat  
325 types to complete the annual cycle. While summer heat stress may be the most vivid threat of a  
326 warming world, climate change may also make winter more challenging by increasing maximum  
327 flows [29] or reducing ice cover [18]. The lack of winter studies in our analysis, and the  
328 emphasis on summer in both empirical studies and climate models [28], suggests that winter may  
329 be a blind spot for climate change adaptation work on Pacific salmon.

330         Our current classification system for longitudinal fish zonation is largely based on  
331 summer sampling [4]. While recent decades have seen an emphasis on more spatially  
332 representative fish sampling [30] and a movement towards multiscale analysis of spatial  
333 distributions [31], this work tends to not be temporally representative. For example, spatially  
334 continuous “riverscape” sampling has been transformative for our understanding of salmonid

335 spatial distributions [6], yet our results confirm that virtually all of this work is conducted during  
336 summer or early autumn [32,33]. While longitudinal patterning is inherently relevant to lotic  
337 ecosystems (because they are linear networks), fish may also exhibit pronounced spatial  
338 patterning in lateral, and vertical dimensions [34]. In temperate regions of the Pacific salmon  
339 range, floodplains may only be connected and wetted during winter, so summer-biased sampling  
340 may hinder our ability to understand the significance of off-channel habitat use. Where summer  
341 and fall are the wet seasons (e.g., much of coastal Alaska), use of off-channel habitats may vary  
342 seasonally and require temporally extensive sampling to understand key dynamics. For example,  
343 the spatial patterning of juvenile coho salmon on a stream floodplain shifted over time, tracking  
344 shifts in water temperature [35] caused by fluctuating water levels. Use of temporary aquatic  
345 habitats by fish may be disproportionately important when they are available at the right place  
346 and time; however, research is lacking to capture this ephemeral aspect of fish ecology [36].

347         The distribution of juvenile salmonids among channel-unit scale habitat types [37] may  
348 also vary among months and seasons. For example, one study found that juvenile coho primarily  
349 occupied backwater pools in spring, main-channel pools in summer, and alcoves and beaver  
350 ponds in winter [38]. Distribution of juvenile salmonids in sub-habitats (e.g. riffles, pools,  
351 backchannel ponds) can also impact fish growth and fitness through energetic costs and benefits  
352 [39]. While fine-detail studies of fish distribution help identify quality salmonid habitat, our  
353 analysis demonstrates that this data implicitly favors summer habitat and devalues winter habitat.

354

## 355 **Bias in temporal extent of studies**

356 While a bias against winter studies is seen in temporal distribution, a bias against full annual  
357 studies is seen in temporal extent. Ecological *Oncorhynchus* spp. studies examining all four



358 meteorological seasons represented only 6-10% of total research. Research is heavily skewed  
359 toward shorter, single season studies: 73% of all studies capturing 4 months or less of data and  
360 57% of studies focused on a single season in isolation. Within riverscape studies, 81% of  
361 research occurred during 4 or fewer calendar months. These patterns are similar to patterns  
362 observed in the phenology of mammal, bird, reptile and amphibian research [17]. While there is  
363 increasing recognition of the value of long-term study [40], this usually means having multiple  
364 years or decades of data collection. Our review shows that there is also a lack of temporal extent  
365 in terms of the annual cycle. Lacking extent at this timescale leads to two issues. First, we are  
366 likely to temporally extrapolate and draw conclusions based on a subset of the year (as discussed  
367 above) and second, we will often lack the ability to identify interactions between different time  
368 periods, or carry-over effects [17].

369         Carry-over effects from one life stage or season can have significant impacts on fitness  
370 and survival of individuals and populations in subsequent seasons or life stages [41]. As climate  
371 change and increasing water demands make summer more stressful for salmon in regions such as  
372 the western United States, there is a strong need to understand how conditions during spring and  
373 fall mediate the effects of summer stress on freshwater rearing capacity. The ability of fish to  
374 survive negative energy balance during harsh summer conditions should depend on their ability  
375 to store energy in spring and rebuild energy stores in fall. For example, over-winter survival of  
376 juvenile salmon is often positively associated with larger body size at the onset of autumn [42].  
377 There is evidence that ephemeral food subsidy pulses, such as salmon eggs during the adult  
378 spawning season, can positively influence juvenile salmon growth rate and energy density as  
379 long as 6 months after this ephemeral resource pulse has disappeared [43]. Whether juvenile  
380 salmonids grow large enough to consume eggs depends on their emergence timing and early

381 growth opportunities [44]. Thus, small increases in the growth of fry during spring may  
382 determine whether marine subsidies benefit parr during fall, influencing overwinter survival and  
383 the size of smolts the following spring, which relates to subsequent marine survival [45].

384         Sampling during multiple seasons is more likely to capture any carry-over effects that  
385 span pre-pulse, pulse, and post-pulse. Food availability, along with temperature, strongly affect  
386 fish growth rates with extreme variation in growth between seasons [25,46]. Quantifying fish  
387 growth and food resources at multiple points in time are essential to avoid bias in assumptions  
388 and to identify ephemeral trophic pathways that could be disproportionately important during  
389 that season or in subsequent seasons. Additionally, consequences of increased stress during one  
390 season can be observed in subsequent seasons through differences in fish growth, behavior, and  
391 survival [47,48]. Compensatory responses, such as growth rate and survival after a period of  
392 starvation, may also not be fully realized for many months [49,50]. The lack of full annual cycle  
393 research on Pacific salmon has likely hindered our ability to recognize inter-seasonal carry-over  
394 effects and compensatory responses, which may become increasingly important in the future.

395         A core concept in landscape ecology is that of habitat complementation and different  
396 patches of space functioning at different times (e.g., different life stages or seasons) [51,14]. The  
397 use of habitat by juvenile salmonids shifts 1) seasonally as river conditions such as temperature  
398 gradually change [38] 2) momentarily as a balance of energetic costs and benefits [52], 3)  
399 ontogenetically as resource needs change [2] and 4) ephemerally, such as during discrete events  
400 like floods or drought [14]. Without full annual studies, the effects of these stressors on fish (e.g.  
401 energetic costs, food availability, competition, predation) are poorly understood. Habitat  
402 restoration may be more successful if information is available to allow for targeting of the  
403 limiting life stage or limiting habitat in salmonid productivity [53]. Identification of these

404 productivity limitations is hindered by two kinds of error: an assumption of limitation and an  
405 assumption of importance. First, the assumption that winter is limiting to juvenile salmonid  
406 survival is problematic because without more winter studies we cannot validate this assumption  
407 or understand the mechanisms behind winter mortality or winter vulnerability. Second, if we  
408 assume that summer is more important because significant growth occurs in the summer months,  
409 we assume that summer sampling can characterize spatial distribution and habitat use. This is  
410 problematic because it hinders the ability to identify limitations to juvenile salmonid survival  
411 outside of spring through fall. It is well-established that the challenges faced by stream-dwelling  
412 fishes in winter are vastly different [54]. To best protect the habitat supporting juvenile salmon  
413 and trout, more effort is needed to understand the importance of winter ecology.

414

## 415 **Considerations**

416 The seasonal bias of research could potentially be a product of two human limitations:  
417 environmental challenges and allocation of scarce resources. First, the summer months generally  
418 present the least challenging environmental conditions for human access to salmon-bearing  
419 habitat, particularly in the Pacific Northwest where a significant amount of fish research takes  
420 place: low stream flow, warm temperatures, and minimal precipitation. Sampling fish in the  
421 winter months can be particularly challenging, as snow, ice, and high flow events limit safe  
422 access for researchers and lead to fish exhibiting behaviors that make them difficult to capture  
423 (e.g. winter concealment, nocturnality). Second, academic calendars create a seasonal bias  
424 towards summer field work by their very structure, allowing time for field work while classes are  
425 on break during summer. Field projects outside of academia also often follow a summer-  
426 intensive field season program due to the availability of field technicians who are often college

427 students. Institutional hiring policies can further exaggerate these patterns. For example, at our  
428 institution students cannot work > 20 hours per week during non-summer months, and it costs  
429 ~30% more to hire seasonal assistants that are not students (due to the need for a temporary  
430 hiring agency). This makes non-summer field work considerably more expensive. Thus, a  
431 combination of environmental challenges, logistical hurdles, and institutional culture make field  
432 work more likely to happen in summer.

433

## 434 **Conclusion**

435 In recent decades, stream ecology has strongly emphasized the need for more spatially  
436 comprehensive sampling of fish [6]; however, the focus on space has often come at the cost of  
437 time. Mapping the entire riverscape can reveal rich, multiscale patterns, but efforts typically fail  
438 to reveal how these patterns shift over time. Fish may not occupy every meter of space available  
439 to them, but they do live in every second of time. Furthermore, phenomena such as floodplain  
440 dynamics [1], seasonal movement [55], portfolio effects [56], resource waves [57], and  
441 thermoregulation [58] are driven by the interaction between spatial and temporal variation. We  
442 hope that our review encourages researchers to allocate more of their effort to understudied  
443 portions of the year, which likely hold valuable insights for conservation.

444

## 445 **References**

- 446 1. Whited DC, Lornag MS, Harner MJ, Hauer FR, Kimball JS, Stanford JA. Climate, hydrologic  
447 disturbance, and succession: drivers of floodplain pattern. *Ecology*. 2007;88(4):940-953. doi:  
448 10.1890/05-1149
- 449 2. Werner EE, Gilliam JF. The ontogenetic niche and species interactions in size structured  
450 populations. *Annu Rev Ecol Syst*. 1984;15:393-425. doi: 10.1146/annurev.es.15.110184.002141

- 451 3. Brennan SR, Schindler DE, Cline TJ, Walsworth TE, Buck G, Fernandez DP. Shifting habitat  
452 mosaics and fish production across river basins. *Science*. 2019;364(6442):783-786. doi:  
453 10.1126/science.aav4313
- 454 4. Huet M. Profiles and biology of western European streams as related to fish management. *Trans*  
455 *Am Fish Soc*. 1959;88:155-163. doi: 10.1577/1548-8659(1959)88[155:PABOWE]2.0.CO;2
- 456 5. Vannote RL, Minshall GW, Cummins KW, Sedell JR, Cushing CE. The River Continuum  
457 Concept. *Can J Fish Aquat Sci*. 1980;37:130-137. doi: 10.1139/f80-017
- 458 6. Fausch KD, Torgersen CE, Baxter CV, Li HW. Landscapes to riverscapes: bridging the gap  
459 between research and conservation of stream fishes. *BioScience*. 2002;52(6):483-498. doi:  
460 10.1641/0006-3568(2002)052[0483:LTRBTG]2.0.CO;2
- 461 7. Ward JV. The four-dimensional nature of lotic ecosystems. *J North Am Benthol Soc*.  
462 1989;8(1):2-8. doi: 10.2307/1467397
- 463 8. Poff NL, Allan D, Bain MB, Karr JR, Prestegard KL, Richter BD, et al. The natural flow  
464 regime: a paradigm for river conservation and restoration. *BioScience*. 1997;47(11):769-784. doi:  
465 10.2307/1313099
- 466 9. Poole GC, Berman CH. An ecological perspective on in-stream temperature: natural heat  
467 dynamics and mechanisms of human-caused thermal degradation. *Environ Manage*.  
468 2001;27(6):787-802. doi: 10.1007/s002670010188
- 469 10. Caissie D. The thermal regime of rivers: a review. *Freshw Biol*. 2006;51:1389-1406. doi:  
470 10.1111/j.1365-2427.2006.01597.x
- 471 11. Beechie TJ, Sibley TH. Relationships between channel characteristics, woody debris, and fish  
472 habitats in northwestern Washington streams. *Trans Am Fish Soc*. 1997;126:217-229. doi:  
473 10.1577/1548-8659(1997)126<0217:RBCCWD>2.3.CO;2
- 474 12. Mejia FH, Fremier AK, Benjamin JR, Bellmore JR, Grimm AZ, Watson GA, et al. Stream  
475 metabolism increases with drainage area and peaks asynchronously across a stream network.  
476 *Aquat Sci*. 2019;81:9. doi: 10.1007/s00027-018-0606-z
- 477 13. Neverman D, Wurtsbaugh WA. The thermoregulatory function of diel vertical migration for a  
478 juvenile fish, *Cottus extensus*. *Oecologia*. 1994;98:247-256. doi: 10.1007/BF00324211
- 479 14. Schlosser IJ. Critical landscape attributes that influence fish population dynamics in headwater  
480 streams. *Hydrobiologia*. 1995;303:71-81. doi: 10.1007/BF00034045
- 481 15. Fraser NHC, Metcalfe NB. The costs of becoming nocturnal: feeding efficiency in relation to  
482 light intensity in juvenile Atlantic Salmon. *Funct Ecol*. 1997;11:385-391. doi: 10.1046/j.1365-  
483 2435.1997.00098.x
- 484 16. Bramblett RG, Bryant MD, Wright BE, White RG. Seasonal use of small tributary and main-stem  
485 habitats by juvenile steelhead, coho salmon, and dolly varden in a southeastern Alaska drainage  
486 basin. *Trans Am Fish Soc*. 2002;131:498-506. doi: 10.1577/1548-  
487 8659(2002)131<0498:SUOSTA>2.0.CO;2

- 488 17. Marra PP, Cohen EB, Loss SR, Rutter JE, Tonra CM. A call for full annual cycle research in  
489 animal ecology. *Biol Lett*. 2015;11:20150552. doi: 10.1098/rsbl.2015.0552
- 490 18. Huusko A, Greenberg L, Stickler M, Linnansaari T, Nykänen M, Vehanen T, et al. Life in the ice  
491 lane: the winter ecology of stream salmonids. *River Res Appl*. 2007;23:469-491. doi:  
492 10.1002/rra.999
- 493 19. Uehlinger U. Annual cycle and inter-annual variability of gross primary production and  
494 ecosystem respiration in a floodprone river during a 15-year period. *Freshw Biol*.  
495 2006;51(5):938-950. doi: 10.1111/j.1365-2427.2006.01551.x
- 496 20. Hurst TP, Conover DO. Seasonal and interannual variation in the allometry of energy allocation  
497 in juvenile striped bass. *Ecology*. 2003;84:3360-3369. doi: 10.1890/02-0562
- 498 21. Cunjak RA, Curry R, Power G. Seasonal energy budget of brook trout in streams: implications  
499 for a possible deficit in early winter. *Trans Am Fish Soc*. 1987;116(6):817-828. doi:  
500 10.1577/1548-8659(1987)116<817:SEBOBT>2.0.CO;2
- 501 22. McMeans BC, McCann KS, Guzzo MM, Bartley TJ, Bieg C, Blanchfield P, et al. Winter in  
502 water: differential responses and the maintenance of biodiversity. *Ecol Lett*. 2020;23:922-938.  
503 doi: 10.1111/ele.13504
- 504 23. Bustard DR, Narver DW. Aspects of the winter ecology of juvenile coho salmon (*Oncorhynchus*  
505 *kisutch*) and steelhead trout (*Salmo gairdneri*). *J Fish Res Board Can*. 1975;32(5):667-680. doi:  
506 10.1139/f75-086
- 507 24. Cederholm CJ, Bilby RE, Bisson PA, Bumstead TW, Fransen BR, Scarlett WJ, et al. Response of  
508 juvenile coho salmon and steelhead to placement of large woody debris in a coastal Washington  
509 stream. *N Am J Fish Manag*. 1997;17:947-963. doi: 10.1577/1548-  
510 8675(1997)017<0947:ROJCSA>2.3.CO;2
- 511 25. Tattam IA, Li HW, Giannico GR, Ruzycki JR. Seasonal changes in spatial patterns of  
512 *Oncorhynchus mykiss* growth require year-round monitoring. *Ecol Freshw Fish*. 2017;26(3):434-  
513 443. doi: 10.1111/eff.12287
- 514 26. Guisan A, Thuiller W. Predicting species distribution: offering more than simple habitat models.  
515 *Ecol Lett*. 2005;8(9):993-1009. doi: 10.1111/j.1461-0248.2005.00792.x
- 516 27. Smeraldo W, Febbraro MD, Bosso L, Flaquer C, Guixé D, Lisón F, et al. Ignoring seasonal  
517 changes in the ecological niche of non-migratory species may lead to biases in potential  
518 distribution models: lessons from bats. *Biodivers Conserv*. 2018;27:2425-2441. doi:  
519 10.1007/s10531-018-1545-7
- 520 28. Isaak DJ, Young MK, Nagel DE, Horan DL, Groce MC. The cold-water climate shield:  
521 delineating refugia for preserving salmonid fishes through the 21st century. *Glob Chang Biol*.  
522 2015;21:2540-2553. doi: 10.1111/gcb.12879
- 523 29. McCabe GJ, Clark MP, Hay LE. Rain-on-snow events in the western United States. *Bull Am*  
524 *Meteorol Soc*. 2007;88(3):319-328. doi: 10.1175/BAMS-88-3-319

- 525 30. Angermeier PL, Smogor RA. Estimating number of species and relative abundances in stream-  
526 fish communities: effects of sampling effort and discontinuous spatial distributions. *Can J Fish*  
527 *Aquat Sci.* 1994;52:936-949. doi: 10.1139/f95-093
- 528 31. Wiens JA. Riverine landscapes: taking landscape ecology into the water. *Freshw Biol.*  
529 2002;47(4):501-515. doi: 10.1046/j.1365-2427.2002.00887.x
- 530 32. Brenkman SJ, Duda JJ, Torgersen CE, Welty E, Pess GR, Peters R, et al. A riverscape  
531 perspective of Pacific salmonids and aquatic habitats prior to large-scale dam removal in the  
532 Elwha River, Washington, USA. *Fish Manag Ecol.* 2012;19(1):36-53. doi: 10.1111/j.1365-  
533 2400.2011.00815.x
- 534 33. Flitcroft R, Burnett K, Snyder J, Reeves G, Ganio L. Riverscape patterns among years of juvenile  
535 coho salmon in midcoastal Oregon: implications for conservation. *Trans Am Fish Soc.*  
536 2014;143:26-38. doi: 10.1080/00028487.2013.824923
- 537 34. Favrot SD, Jonasson BC, Peterson JT. Fall and winter microhabitat use and suitability for spring  
538 Chinook salmon parr in a U.S. Pacific Northwest river. *Trans Am Fish Soc.* 2018;147(1):151-  
539 170. doi: 10.1002/tafs.10011
- 540 35. Armstrong JB, Schindler DE. Going with the flow: spatial distributions of juvenile coho salmon  
541 track an annually shifting mosaic of water temperature. *Ecosystems.* 2013;16:1429-1441. doi:  
542 10.1007/s10021-013-9693-9
- 543 36. Heim KC, McMahon TE, Calle L, Wipfli MS, Falke JA. A general model of temporary aquatic  
544 habitat use: water phenology as a life history filter. *Fish Fish.* 2019;20:802-816. doi:  
545 10.1111/faf.12386
- 546 37. Bisson PA, Nielsen JL, Palmason RA., Grove LE. A system of naming habitat types in small  
547 streams, with examples of habitat utilization by salmonids during low streamflow. 1982; Pages  
548 62-73 in N. B. Armantrout (Ed.) *Acquisition and Utilization of Aquatic Inventory Information.*  
549 *Symposium proceedings, October 28-30, 1981, Portland, Oregon. The Hague Publishing,*  
550 *Billings, MT.*
- 551 38. Nickelson TE, Rodgers JD, Johnson SL, Solazzi MF. Seasonal changes in habitat use by juvenile  
552 coho salmon (*Oncorhynchus kisutch*) in Oregon coastal streams. *Can J Fish Aquat Sci.*  
553 1992;49(4):783-789. doi: 10.1139/f92-088
- 554 39. Rosenfeld JS, Boss S. Fitness consequences of habitat use for juvenile cutthroat trout: energetic  
555 costs and benefits in pool and riffles. *Can J Fish Aquat Sci.* 2001;58(3):585-593. doi:  
556 10.1139/f01-019
- 557 40. Lindenmayer DB, Likens GE, Andersen A, Bowman D, Bull CM, Burns E, et al. Value of long-  
558 term ecological studies. *Austral Ecol.* 2012;37:745-757. doi: 10.1111/j.1442-9993.2011.02351.x
- 559 41. Harrison XA, Blount JD, Inger R, Norris DR, Bearhop S. Carry-over effects as drivers of fitness  
560 differences in animals. *J Anim Ecol.* 2011;80(1):4-18. doi: 10.1111/j.1365-2656.2010.01740.x
- 561 42. Holtby LB. Effects of logging on stream temperatures in Carnation Creek, British Columbia, and  
562 associated impacts on the coho salmon (*Oncorhynchus kisutch*). *Can J Fish Aquat Sci.*  
563 1988;45:502-515. doi: 10.1139/F88-060



- 564 43. Rinella DJ, Wipfli MS, Stricker CA, Heintz RA, Rinella MJ. Pacific salmon (*Oncorhynchus* spp.)  
565 runs and consumer fitness: growth and energy storage in stream-dwelling salmonids increase with  
566 salmon spawner density. *Can J Fish Aquat Sci.* 2012;69:73-84. doi: 10.1139/F2011-133
- 567 44. Armstrong JB, Schindler DE, Omori KL, Ruff CP, Quinn TP. Thermal heterogeneity mediates  
568 the effects of pulsed subsidies across a landscape. *Ecology.* 2010;91(5):1445-1454. doi:  
569 10.1890/09-0790.1
- 570 45. Thompson JN, Beauchamp DA. Size-selective mortality of steelhead during freshwater and  
571 marine life stages related to freshwater growth in the Skagit River, Washington. *Trans Am Fish*  
572 *Soc.* 2014;143:910-925. doi: 10.1080/00028487.2014.901253
- 573 46. Myrvold KM, Kennedy BP. Seasonal variation in growth, consumption and growth efficiency in  
574 overwintering juvenile steelhead. *Ecol Freshw Fish.* 2020;29:450-464. doi: 10.1111/eff.12526
- 575 47. O'Connor CM, Gilmour KM, Arlinghaus R, Hasler CT, Philipp DP, Cooke SJ. Seasonal  
576 carryover effects following the administration of cortisol to a wild teleost fish. *Physiol Biochem*  
577 *Zool.* 2010;83:950-957. doi: 10.1086/656286
- 578 48. O'Connor CM, Gilmour KM, Arlinghaus R, Matsumura S, Suski CD, Philipp DP, et al. The  
579 consequences of short-term cortisol elevation on individual physiology and growth rate in wild  
580 largemouth bass (*Micropterus salmoides*). *Can J Fish Aquat Sci.* 2011;68(4):693-705. doi:  
581 10.1139/f2011-009
- 582 49. Morgan IJ, Metcalfe NB. Deferred costs of compensatory growth after autumnal food shortage in  
583 juvenile salmon. *Proc. R. Soc. B.* 2001;268:295-301. doi: 10.1098/rspb.2000.1365
- 584 50. Johnsson JI, Bohlin T. The cost of catching up: increased winter mortality following structural  
585 growth compensation in the wild. *Proc. R. Soc. B.* 2006;273:1281-1286. doi:  
586 10.1098/rspb.2005.3437
- 587 51. Dunning JB, Danielson BJ, Pulliam HR. Ecological processes that affect populations in complex  
588 landscapes. *Oikos.* 1992;65:169-175. doi: 10.2307/3544901
- 589 52. Rosenfeld J. Assessing the habitat requirements of stream fishes: an overview and evaluation of  
590 different approaches. *Trans Am Fish Soc.* 2003;132:953-968. doi: 10.1577/T01-126
- 591 53. Roni P, Beechie TJ, Bilby RE, Leonetti FE, Pollock MM, Pess GR. A review of stream  
592 restoration techniques and a hierarchical strategy for prioritizing restoration in Pacific Northwest  
593 watersheds. *N Am J Fish Manag.* 2002;22:1-20. doi: 10.1577/1548-  
594 8675(2002)022<0001:AROSRT>2.0.CO;2
- 595 54. Brown RS, Hubert WA, Daly SF. A primer on winter, ice, and fish: what fisheries biologists  
596 should know about winter ice processes and stream-dwelling fish. *Fisheries.* 2011;36(1):8-26.  
597 doi: 10.1577/03632415.2011.10389052
- 598 55. Baldwin CM, Beauchamp DA, Gubala CP. Seasonal and diel distribution and movement of  
599 cutthroat trout from ultrasonic telemetry. *Trans Am Fish Soc.* 2002;131:143-158. doi:  
600 10.1577/1548-8659(2002)131<0143:SADDAM>2.0.CO;2



- 601 56. Schindler DE, Armstrong JB, Reed TE. The portfolio concept in ecology and evolution. *Front*  
602 *Ecol Environ*. 2015;13(5):257-263. doi: 10.1890/140275
- 603 57. Armstrong JB, Takimoto GT, Schindler DE, Hayes MM, Kauffman MJ. Resource waves:  
604 phenological diversity enhances foraging opportunities for mobile consumers. *Ecology*.  
605 2016;97:1099-1112. doi: 10.1890/15-0554.1
- 606 58. Wurtsbaugh WA, Neverman D. Post-feeding thermotaxis and daily vertical migration in a larval  
607 fish. *Nature*. 1988;333:846-848. doi: 10.1038/333846a0

608

## 609 **Supporting information**

610 **S1 Fig. PRISMA 2009 flow diagram for *Oncorhynchus* studies.**

611 (DOCX)

612

613 **S2 Fig. PRISMA 2009 flow diagram for riverscape studies.**

614 (DOCX)

615

616 **S3 Fig. PRISMA 2009 checklist.**

617 (DOCX)

618

619 **S1 Table. Articles included in *Oncorhynchus* systematic review.**

620 (CSV)

621

622 **S2 Table. Articles included in riverscape systematic review.**

623 (CSV)

bioRxiv preprint doi: <https://doi.org/10.1101/2020.11.24.395665>; this version posted November 24, 2020. The copyright holder for this preprint (which was not certified by peer review) is the author/funder, who has granted bioRxiv a license to display the preprint in perpetuity. It is made available under aCC-BY 4.0 International license.

Number of Studies

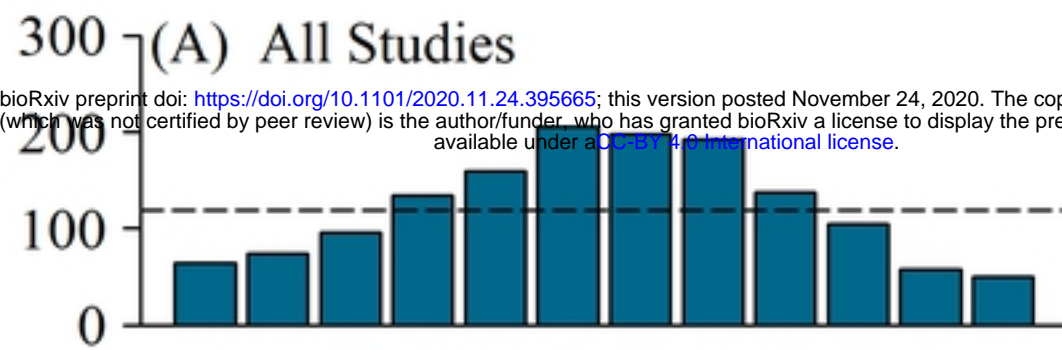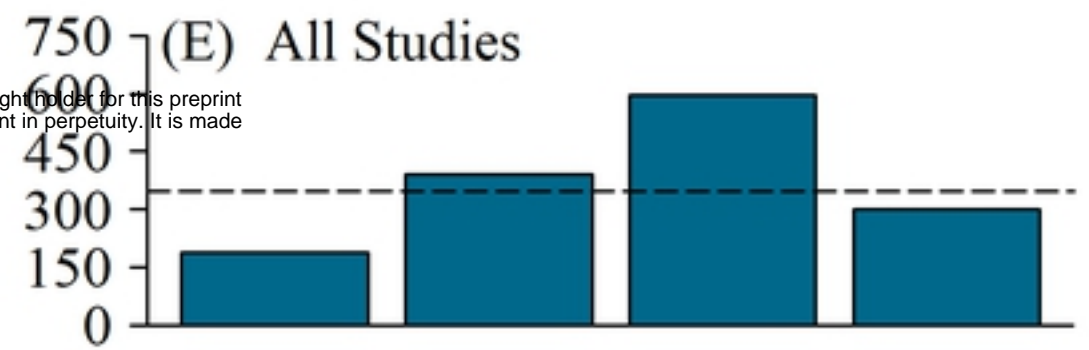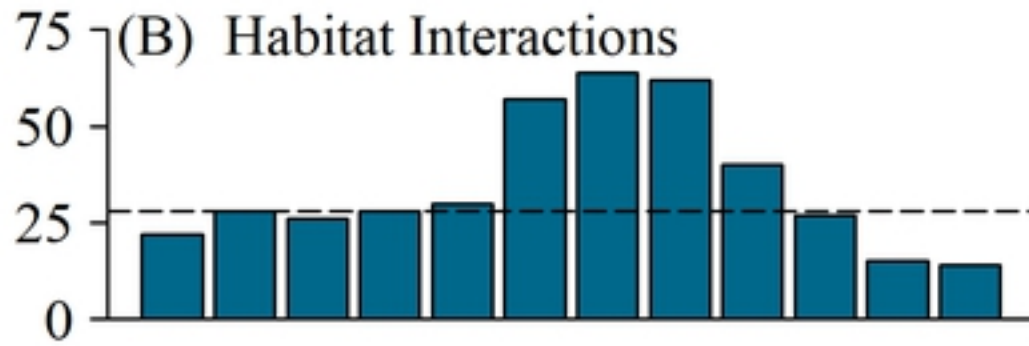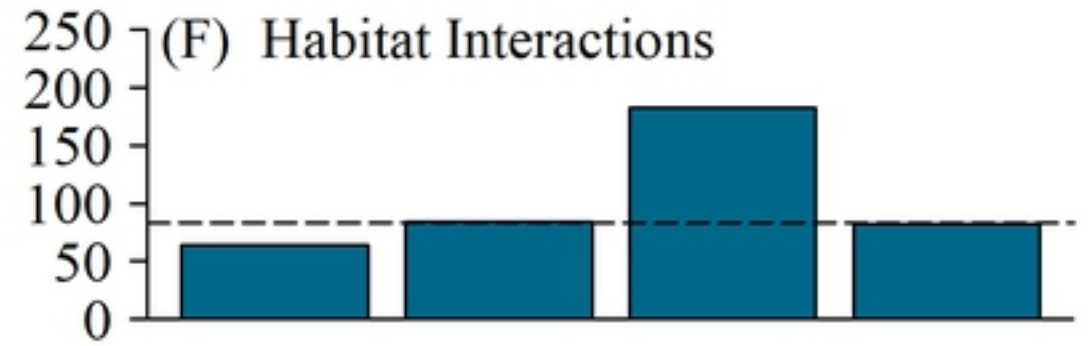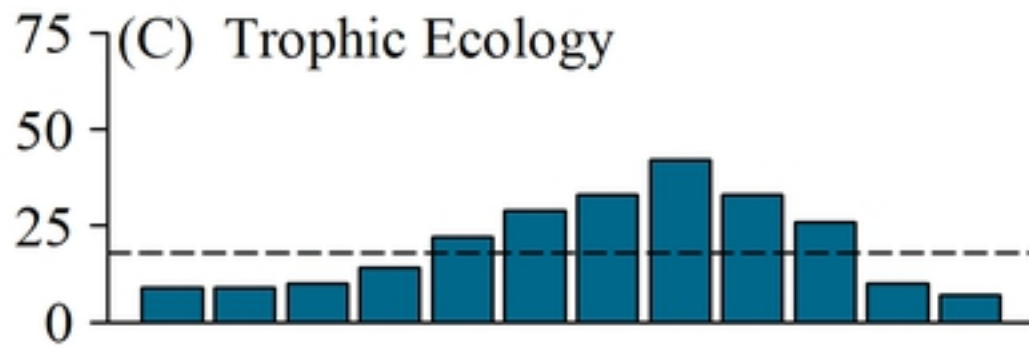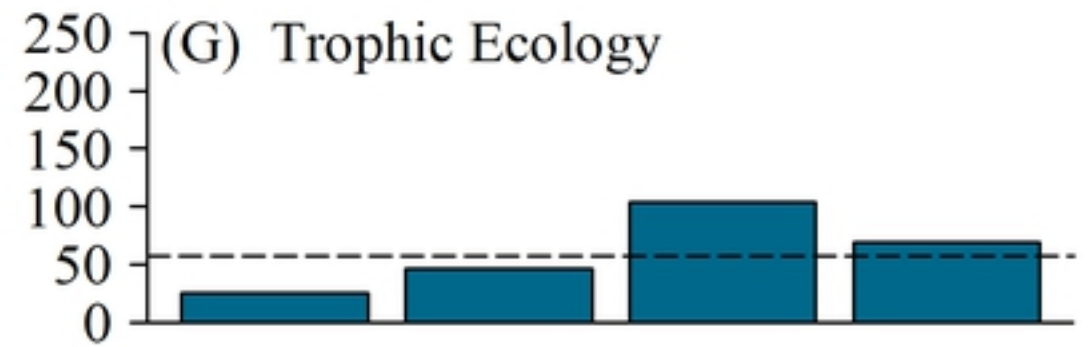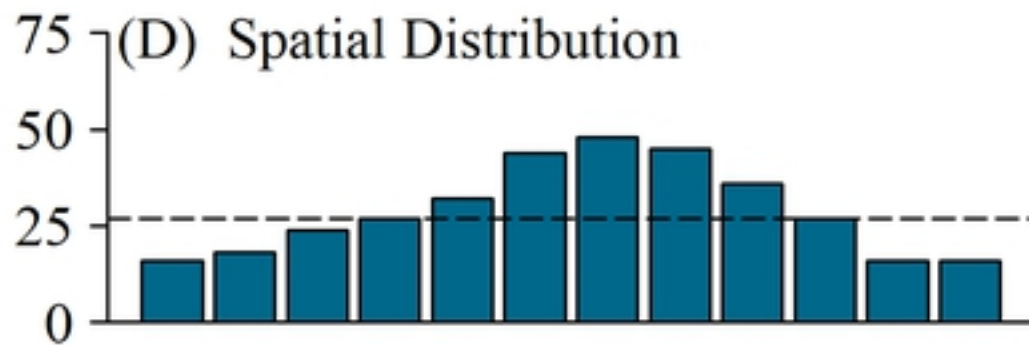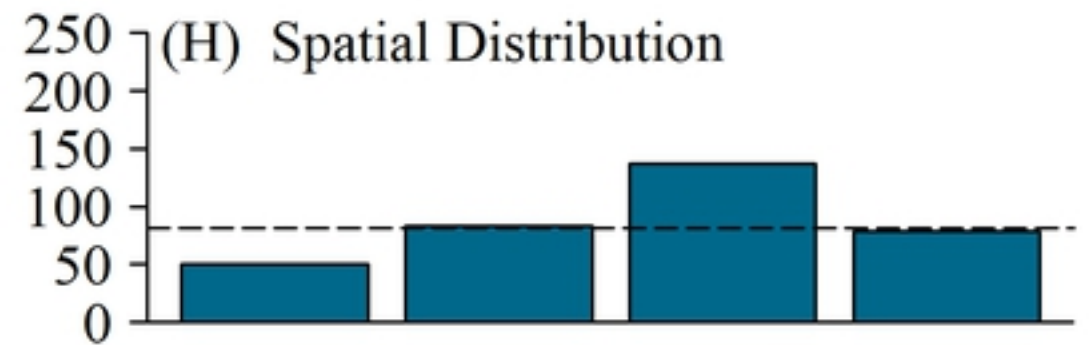

J F M A M J J A S O N D

Month

Wi Sp Su Au

Season

Figure 1

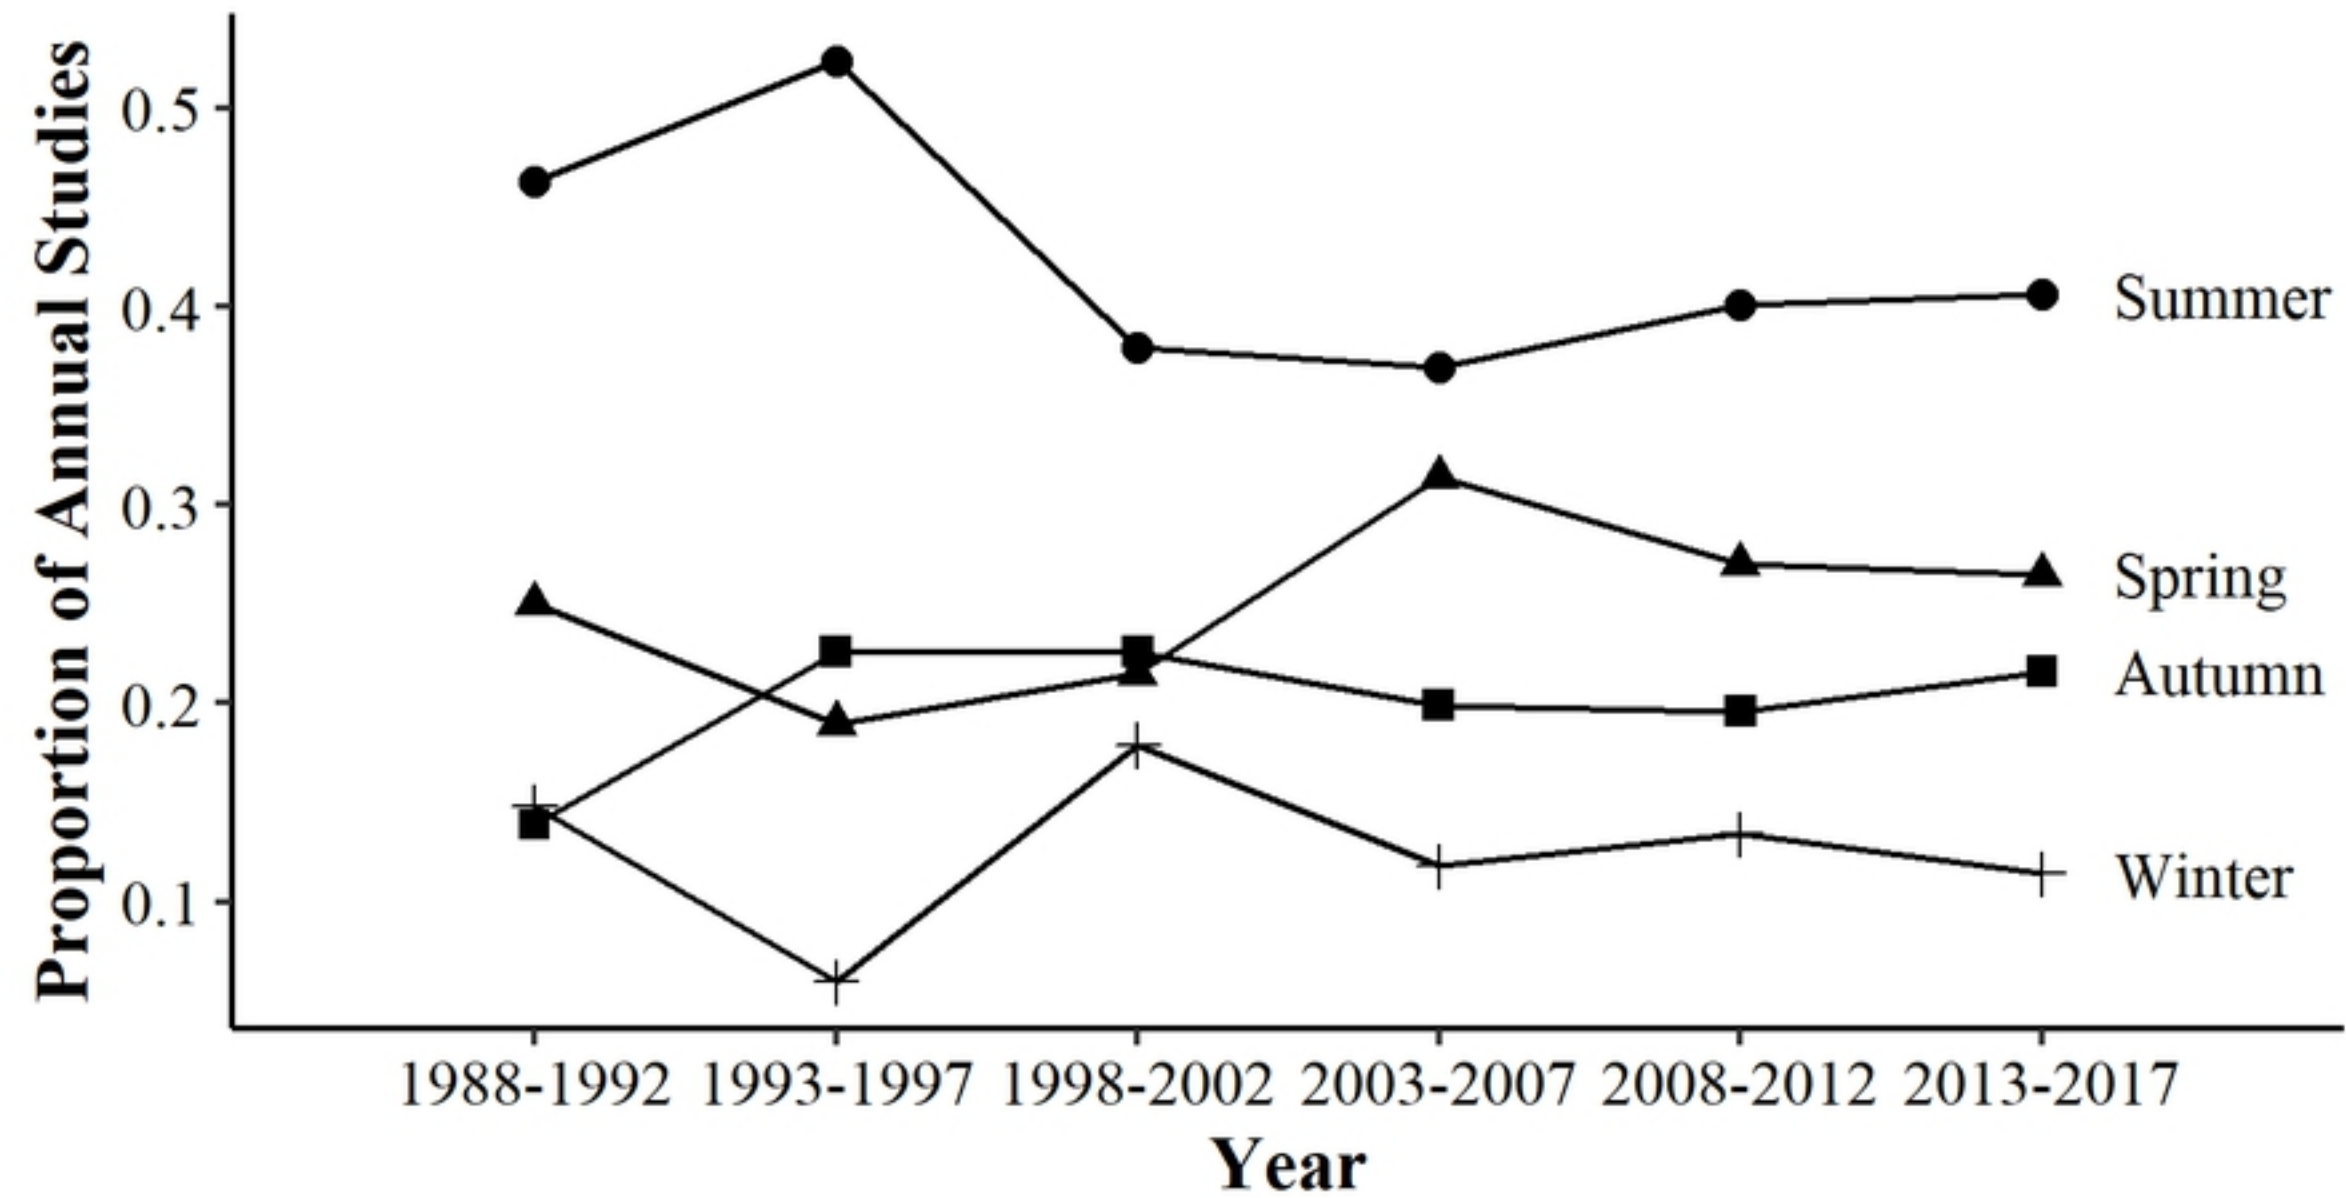

Figure2

bioRxiv preprint doi: <https://doi.org/10.1101/2020.11.24.395665>; this version posted November 24, 2020. The copyright holder for this preprint (which was not certified by peer review) is the author/funder, who has granted bioRxiv a license to display the preprint in perpetuity. It is made available under aCC-BY 4.0 International license.

Percentage (%) of Studies

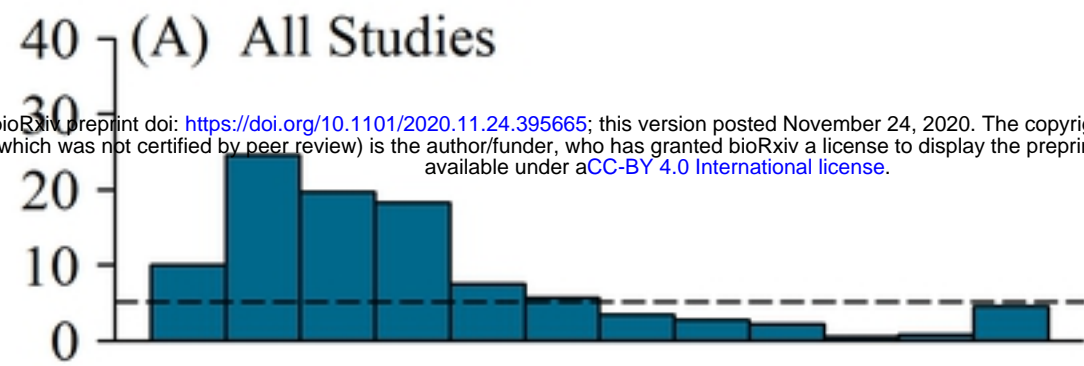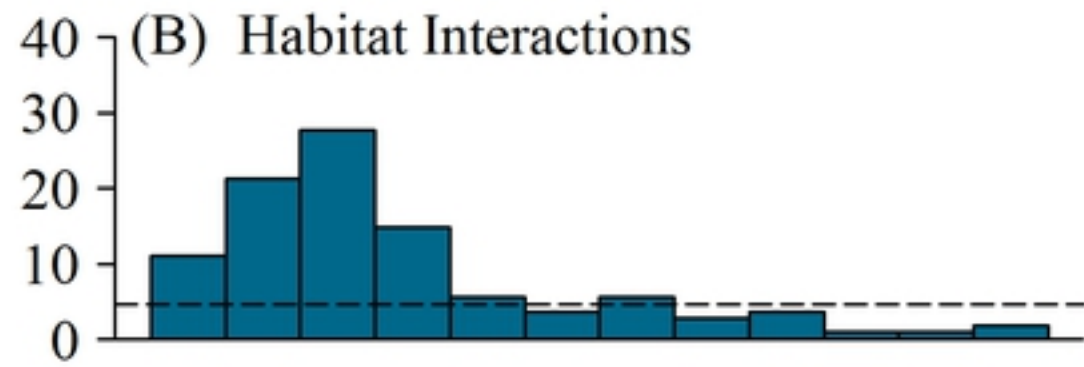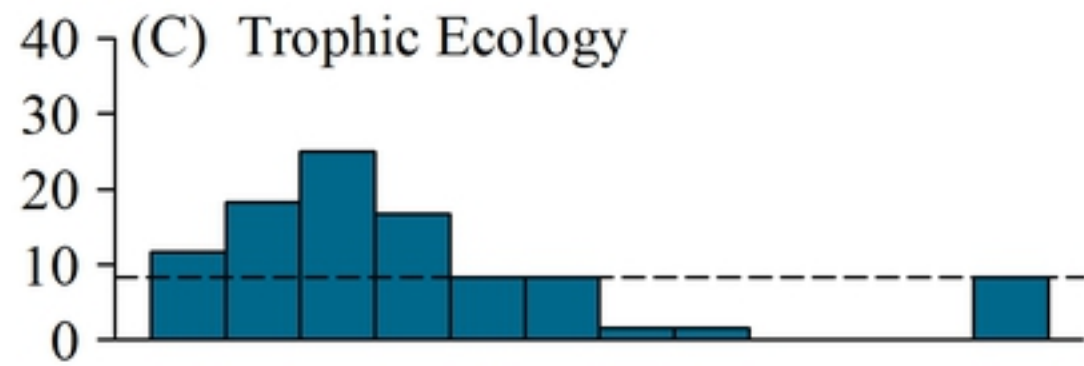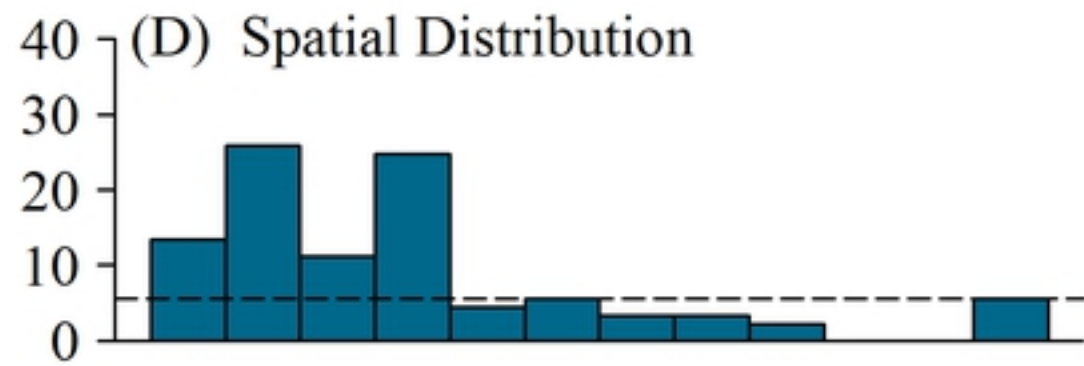

1 2 3 4 5 6 7 8 9 10 11 12

Number of Months

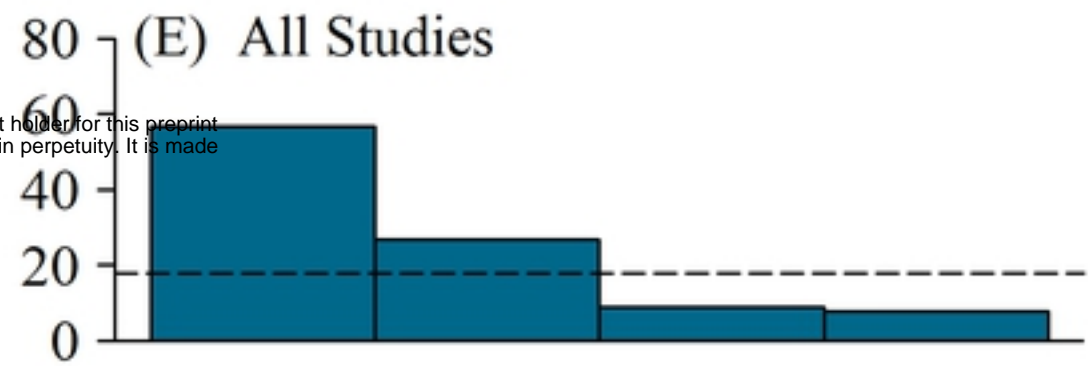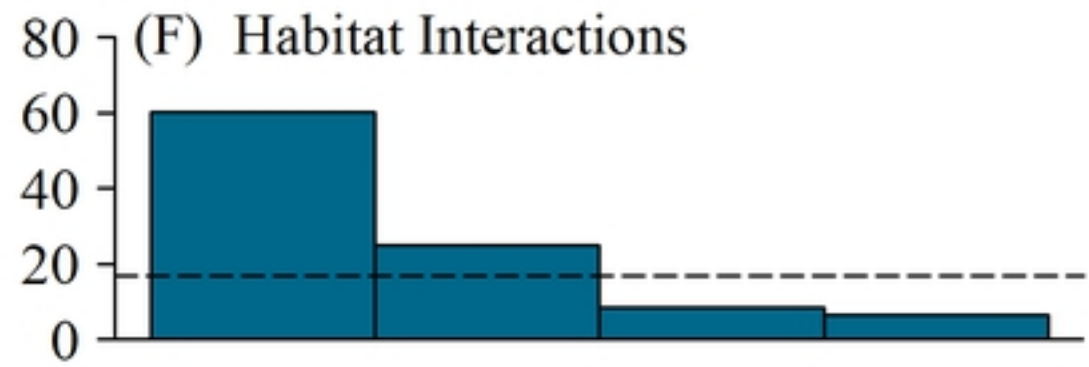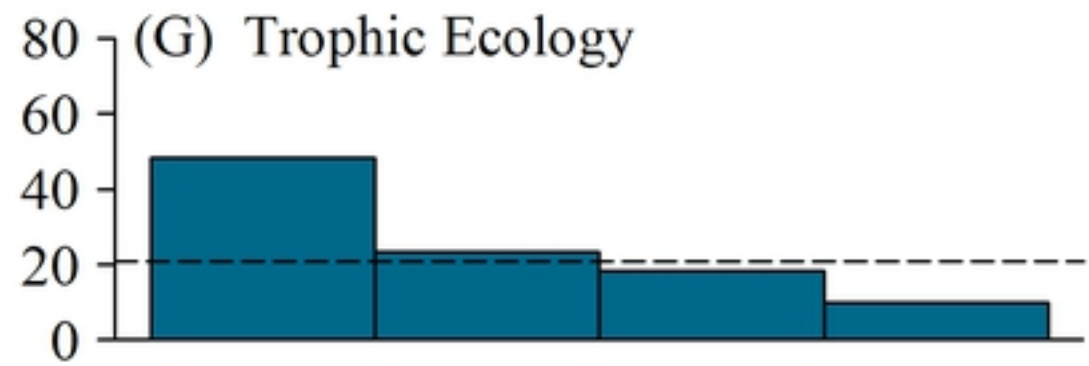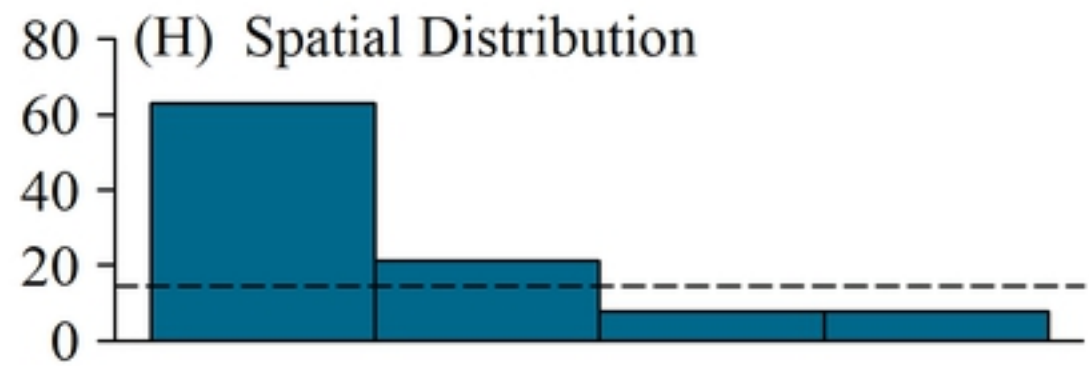

1 2 3 4

Number of Seasons

Figure3

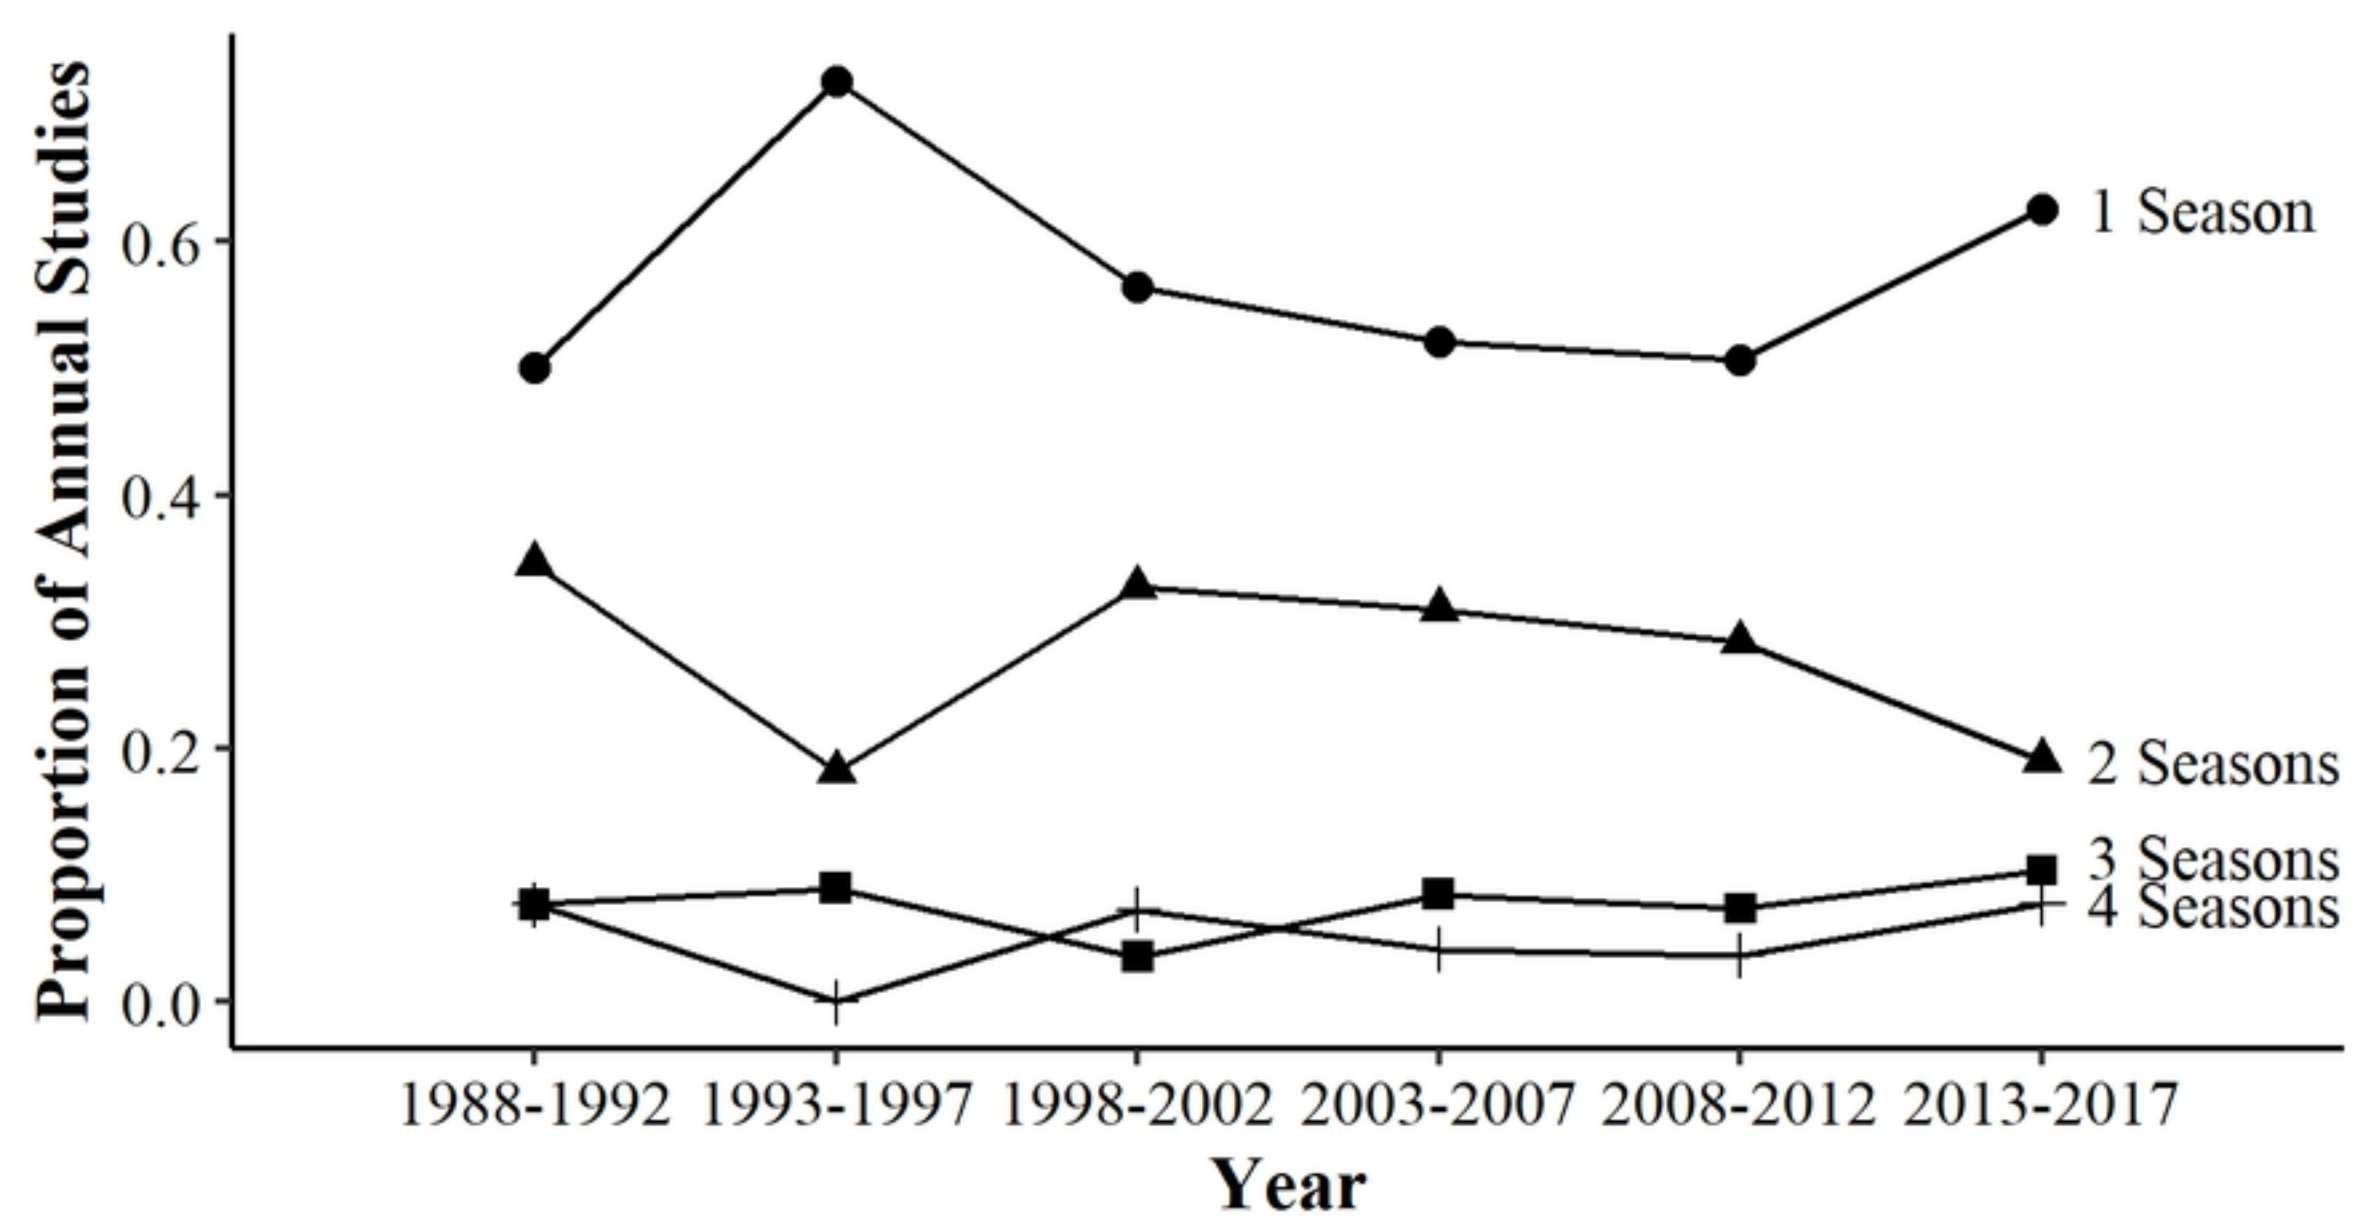

Figure4



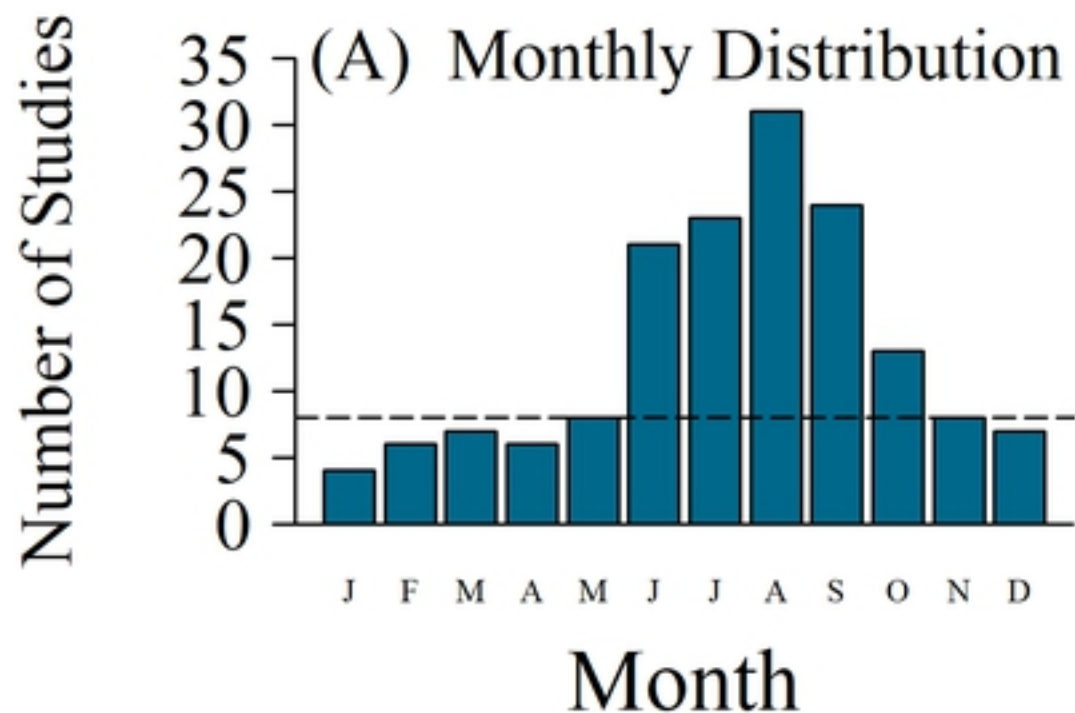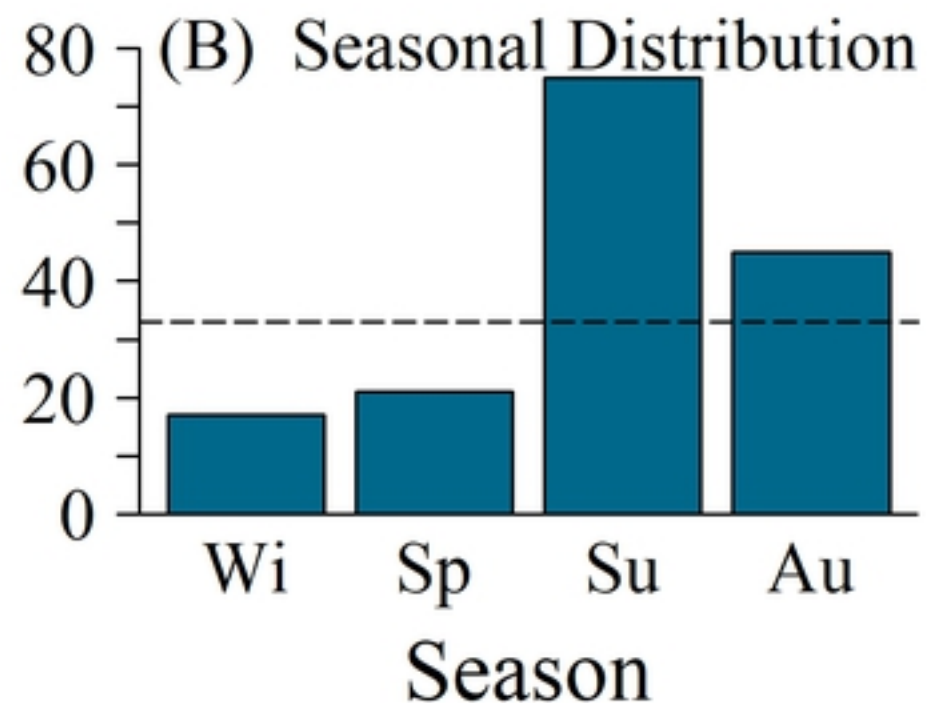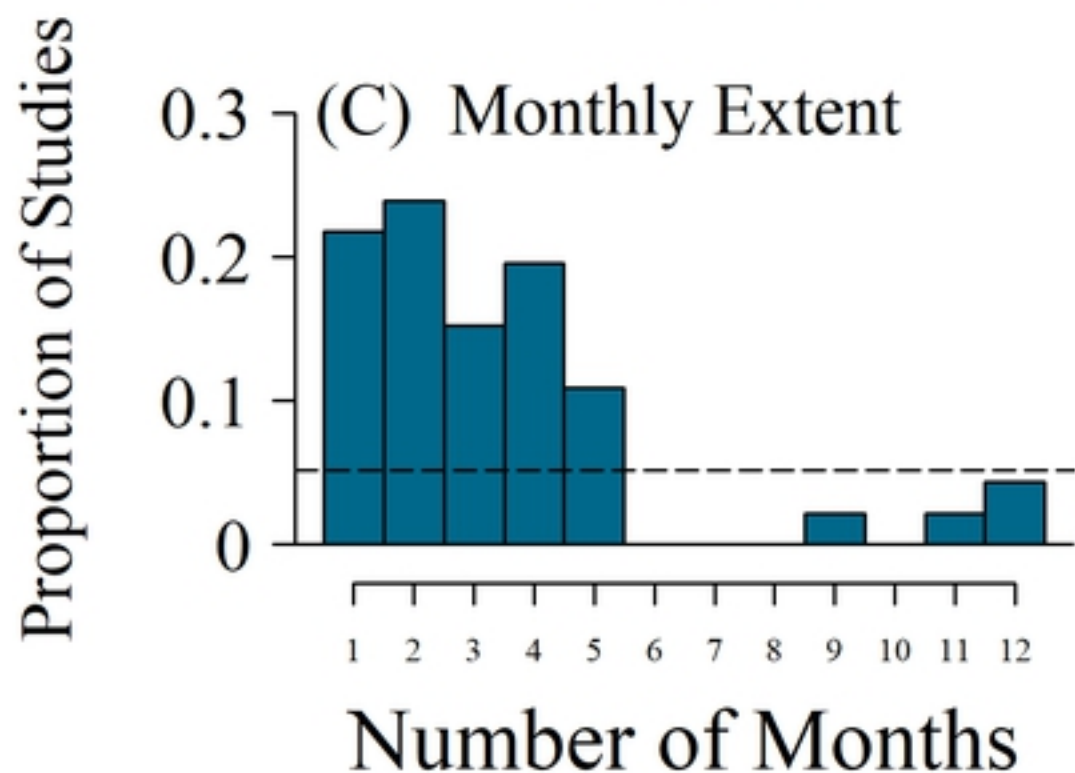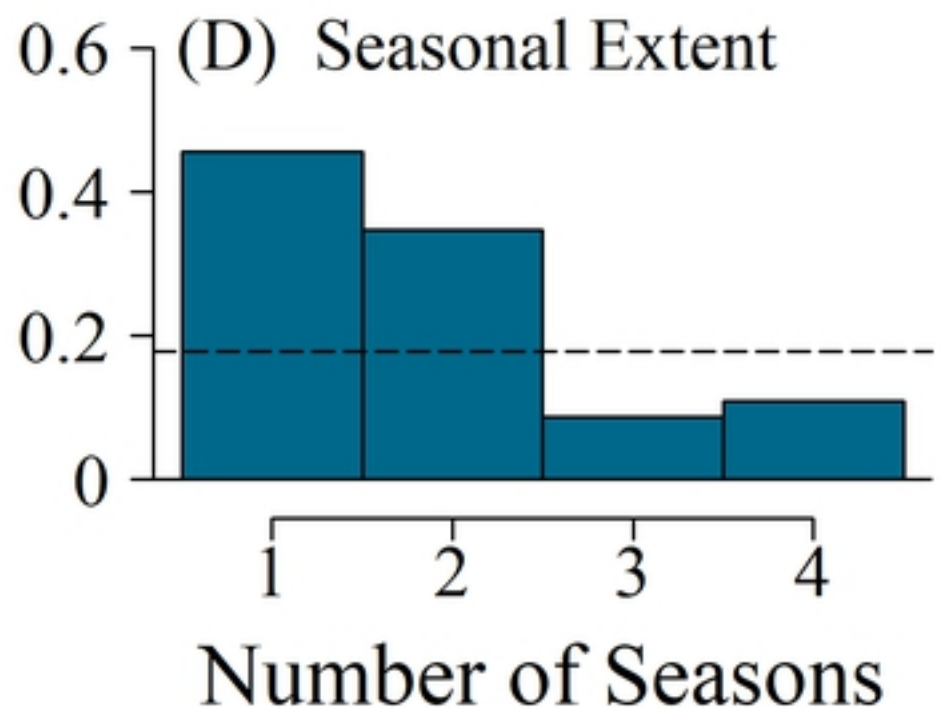

Figure5
